# Supplementary material
Source: PubMed Central journal article supplement (PMC1859962)

**(A)**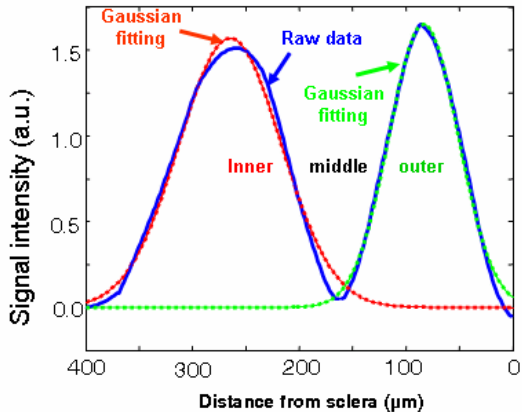**(B)**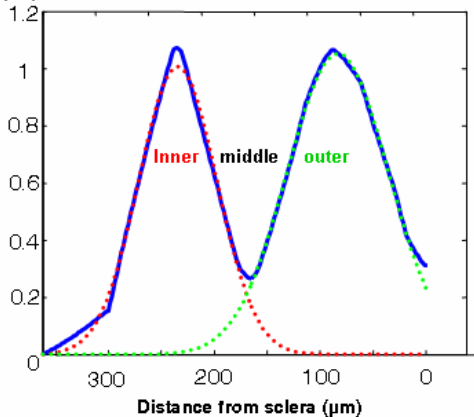

Supplement: pnas_0605790103_1.pdf [file pnas_0605790103_1.pdf]
